# Supplementary material for: Isolation and Cytotoxicity Evaluation of the Chemical Constituents from Cephalantheropsis gracilis
Source: MDPI journal article supplement (doi:10.3390/ijms16023980), 2015-02-12
Supplement: s1 [file s1]

# Supplementary Information

$^1\text{H}$  NMR acetone- $d_6$  300 MHz

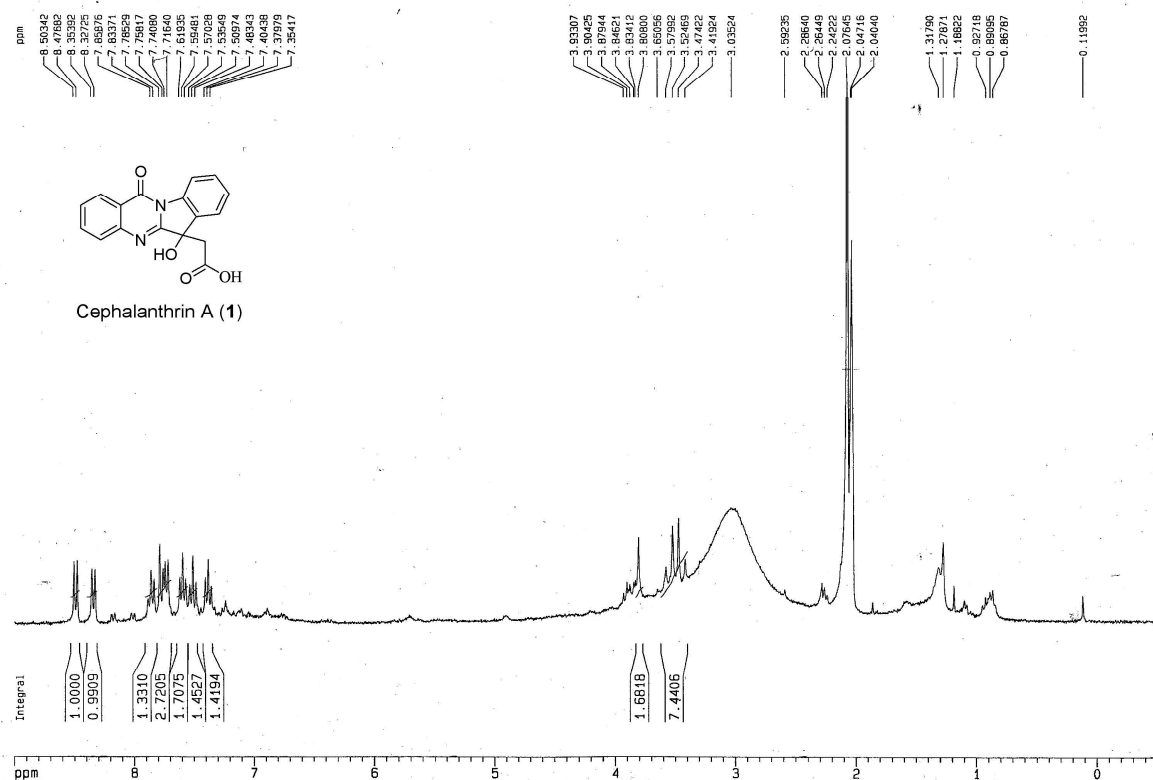

$^{13}\text{C}$  NMR acetone- $d_6$  75 MHz

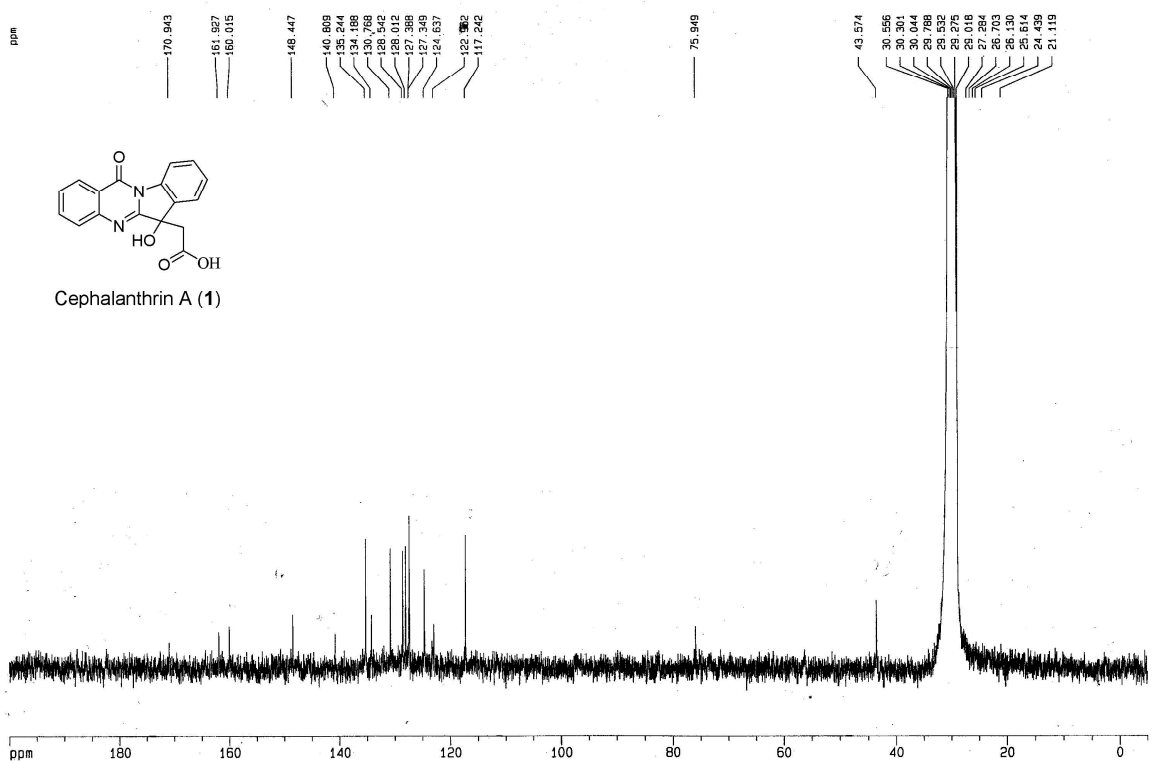

**Figure S1.**  $^1\text{H}$  and  $^{13}\text{C}$  NMR spectra of compounds 1.

<sup>1</sup>H NMR CDCl<sub>3</sub> 300 MHz

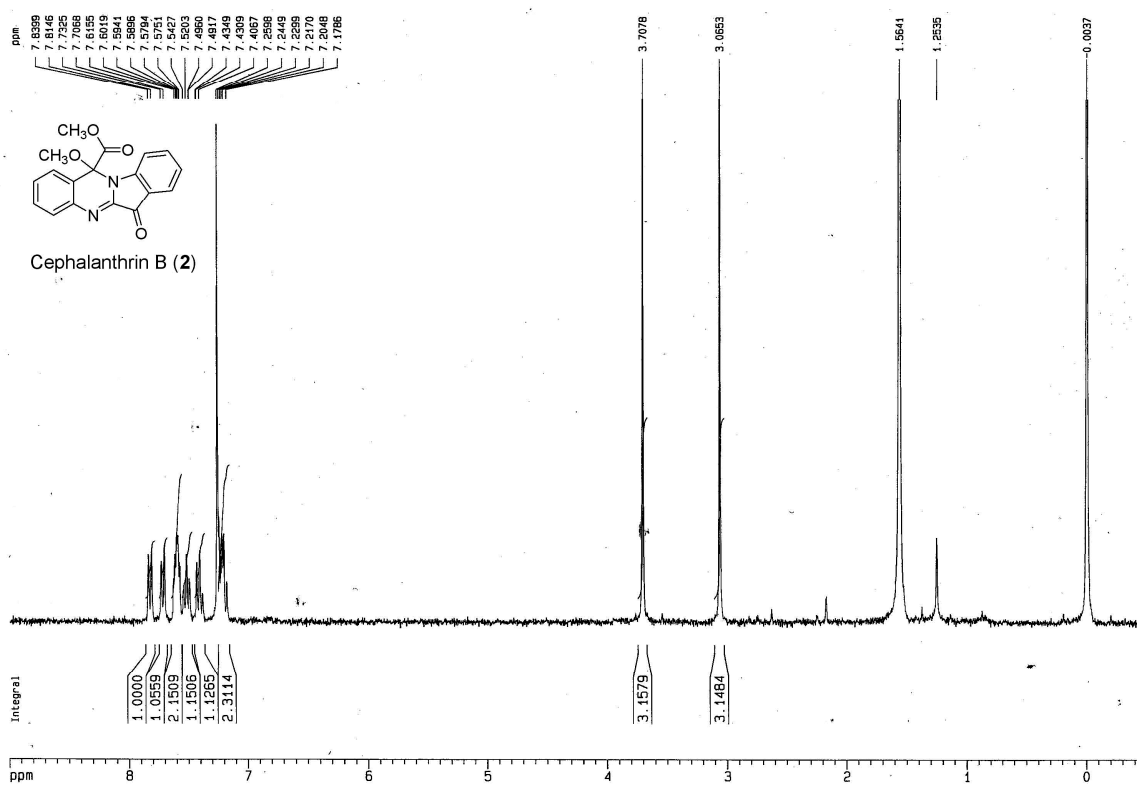

<sup>13</sup>C NMR CDCl<sub>3</sub> 75 MHz

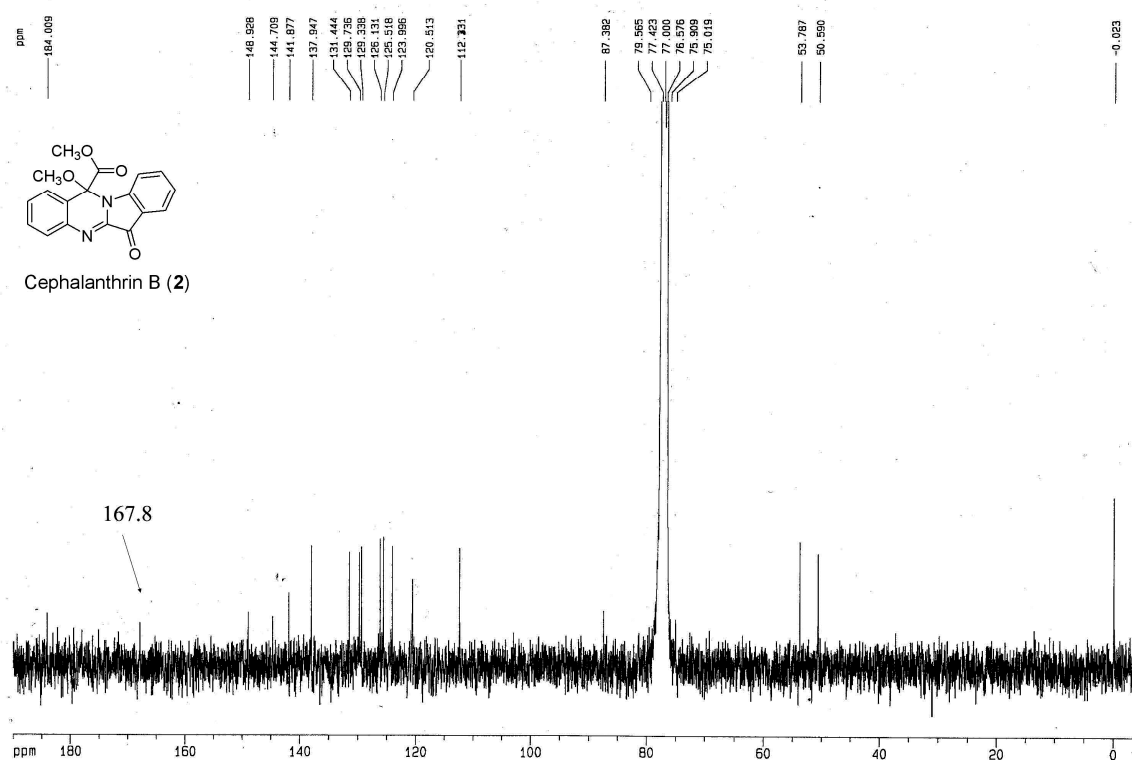

Figure S2. <sup>1</sup>H and <sup>13</sup>C NMR spectra of compounds 2.

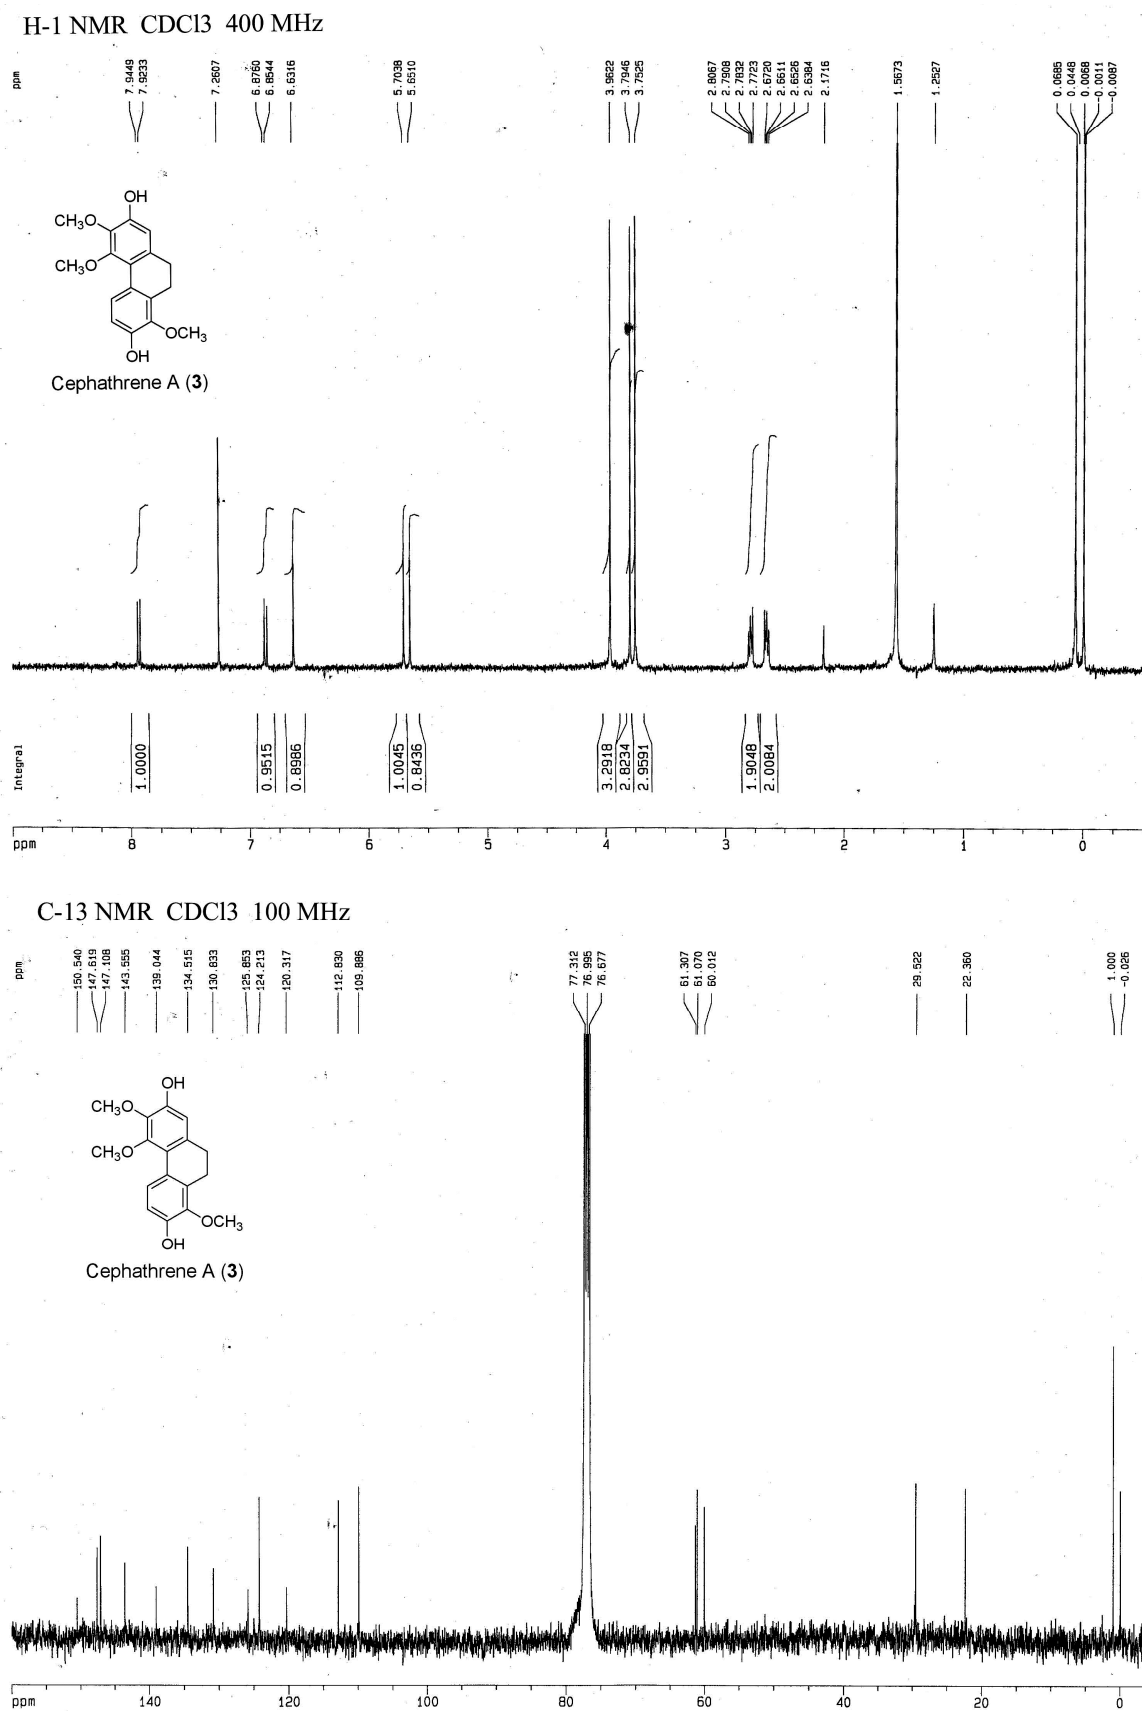

Figure S3. <sup>1</sup>H and <sup>13</sup>C NMR spectra of compounds 3.

H-1 NMR CDCl<sub>3</sub> 300 MHz

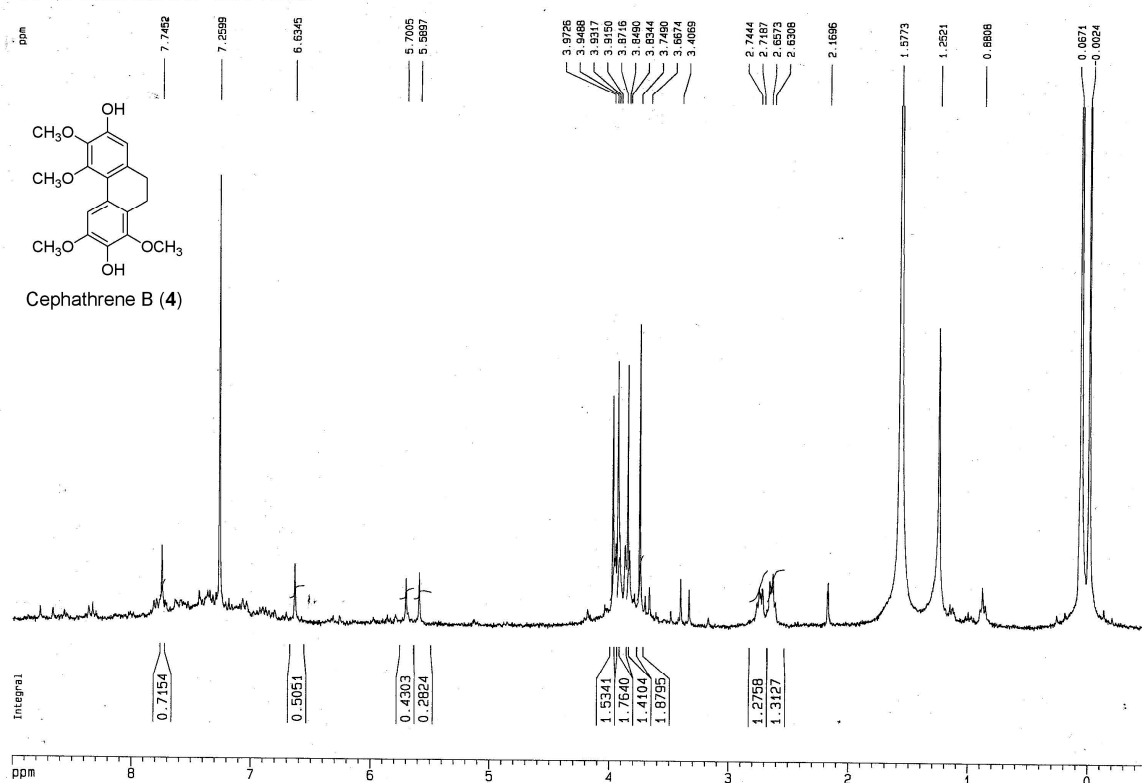

C-13 NMR CDCl<sub>3</sub> 75 MHz

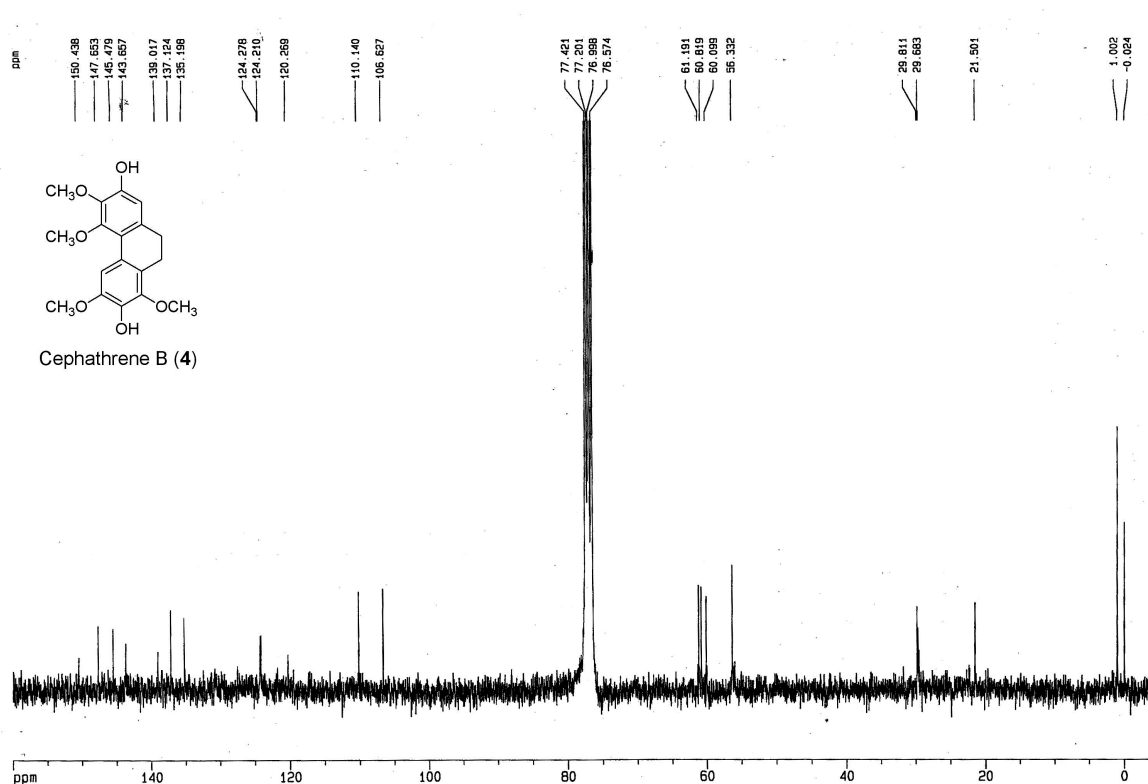

Figure S4. <sup>1</sup>H and <sup>13</sup>C NMR spectra of compounds 4.

<sup>1</sup>H NMR acetone-d<sub>6</sub> 300 MHz

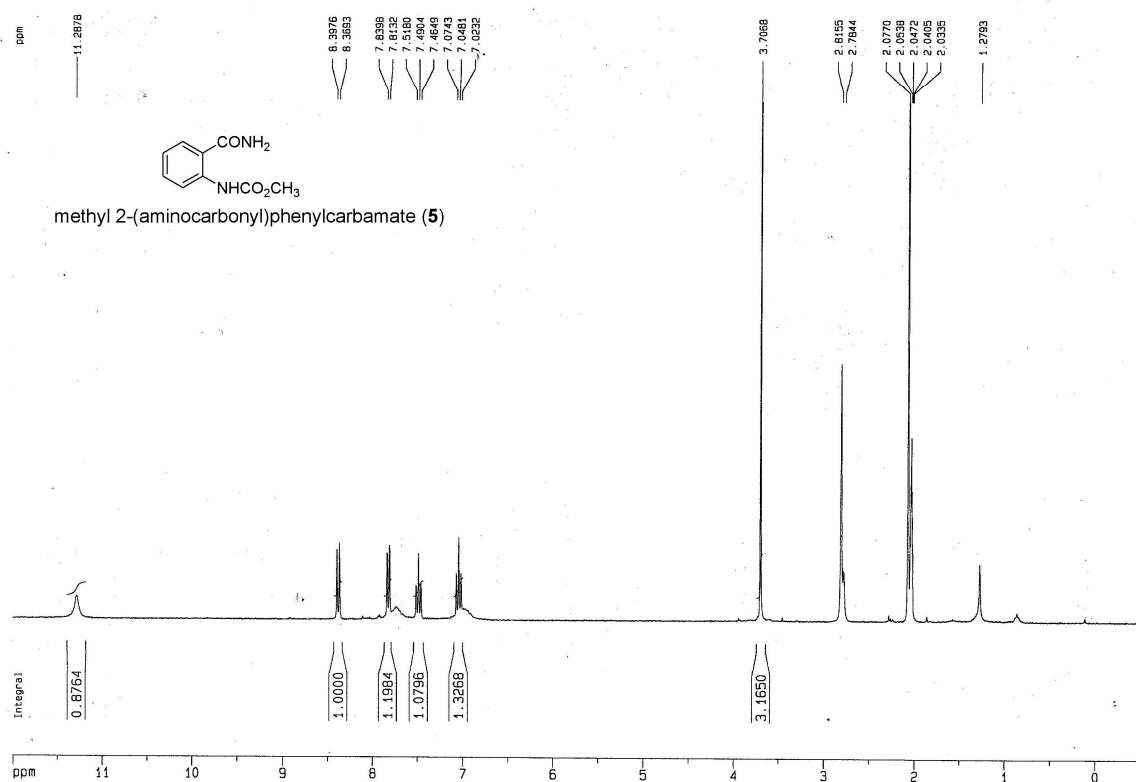

<sup>13</sup>C NMR acetone-d<sub>6</sub> 75 MHz

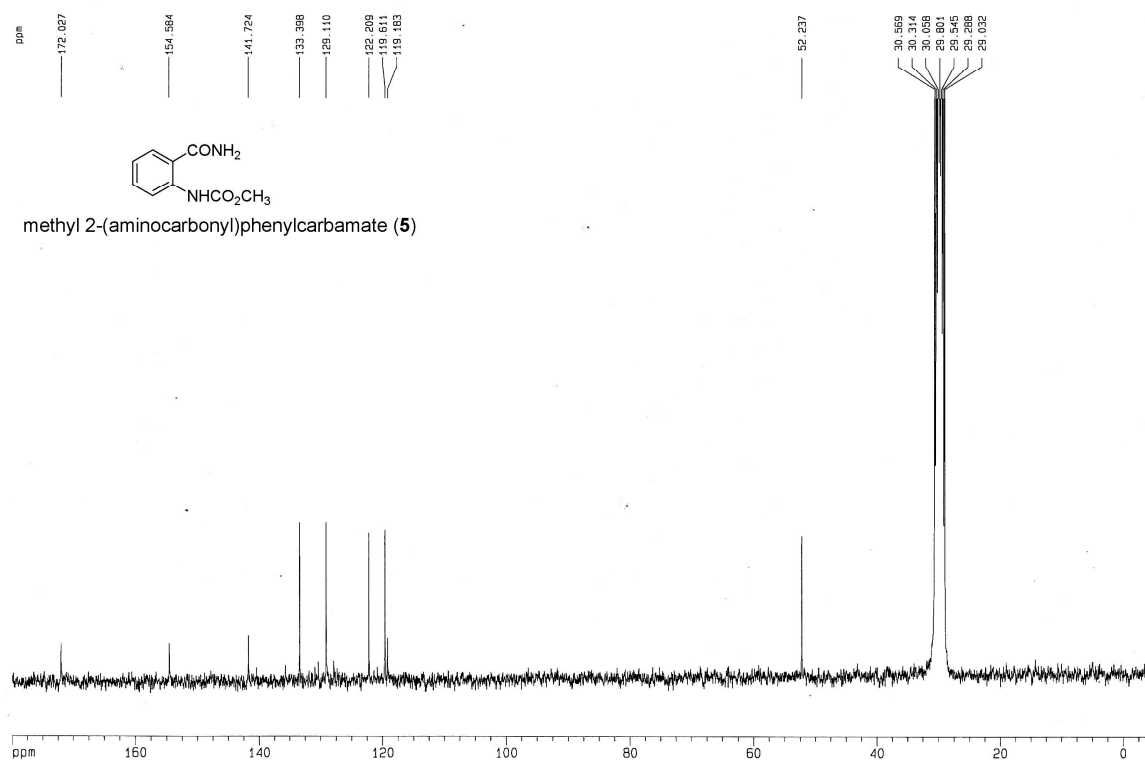

Figure S5. <sup>1</sup>H and <sup>13</sup>C NMR spectra of compounds **5**.
